# Supplementary material for: Bivalent promoter hypermethylation in cancer is linked to the H327me3/H3K4me3 ratio in embryonic stem cells
Source: PubMed Central journal article supplement (PMC7057567; doi:10.1186/s12915-020-0752-3), 2020-03-04

a) **Elbow method** (Optimal number of clusters for ChIPseq heatmap shown in Figure 2d)

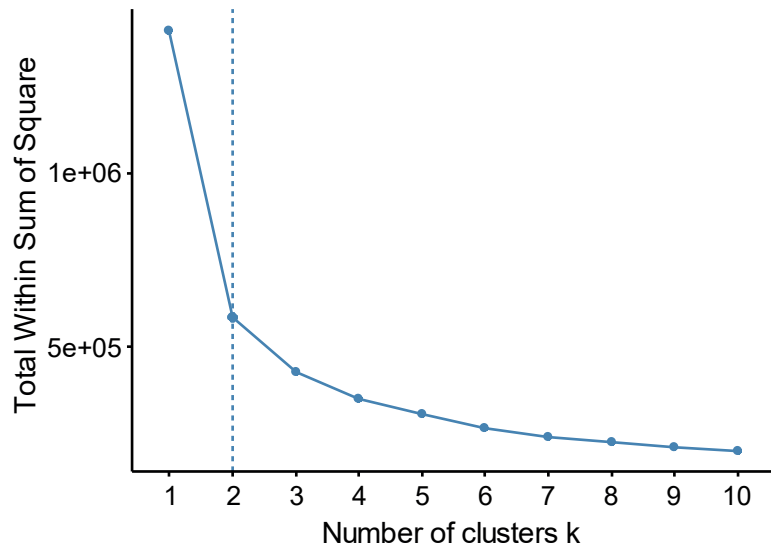

b) **Silhouette method** (Optimal number of clusters for ChIPseq heatmap shown in Figure 2d)

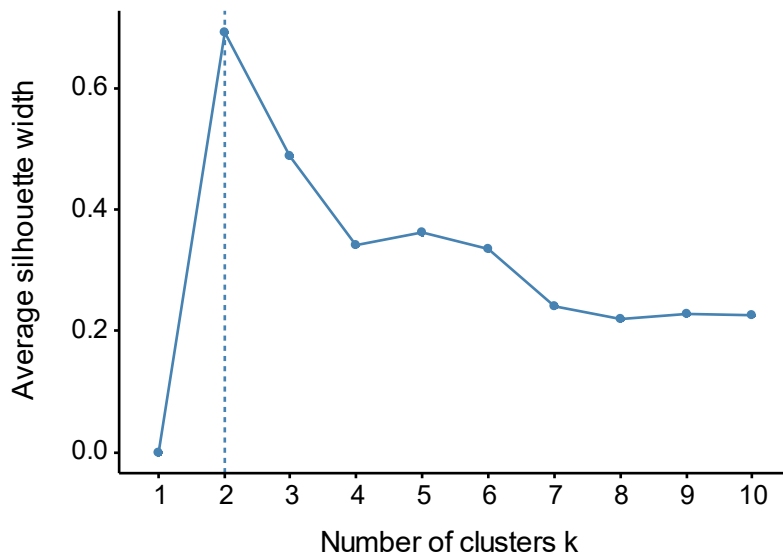

Supplement: 12915_2020_752_MOESM2_ESM.pdf [file 12915_2020_752_MOESM2_ESM.pdf]
