# Supplementary material for: Bivalent promoter hypermethylation in cancer is linked to the H327me3/H3K4me3 ratio in embryonic stem cells
Source: PubMed Central journal article supplement (PMC7057567; doi:10.1186/s12915-020-0752-3), 2020-03-04

hiBiv

K27me3/K4me3 ratio development

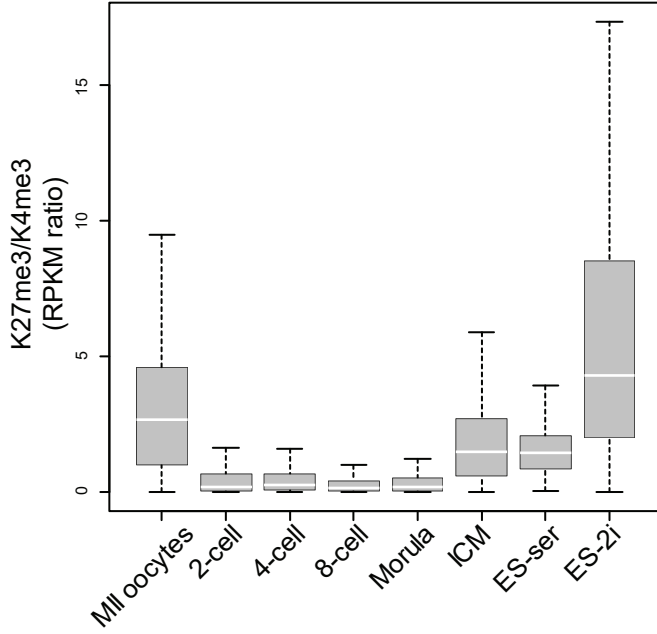

K4me3/K27me3 ratio development

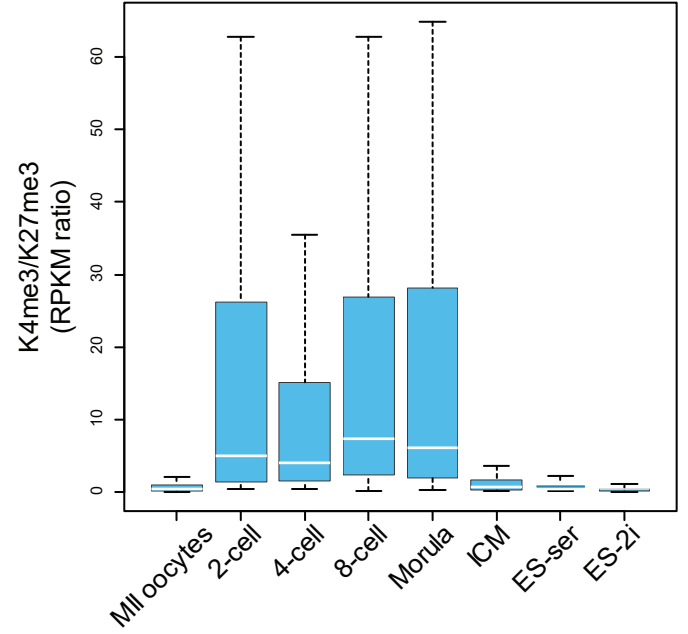

loBiv

K27me3/K4me3 ratio development

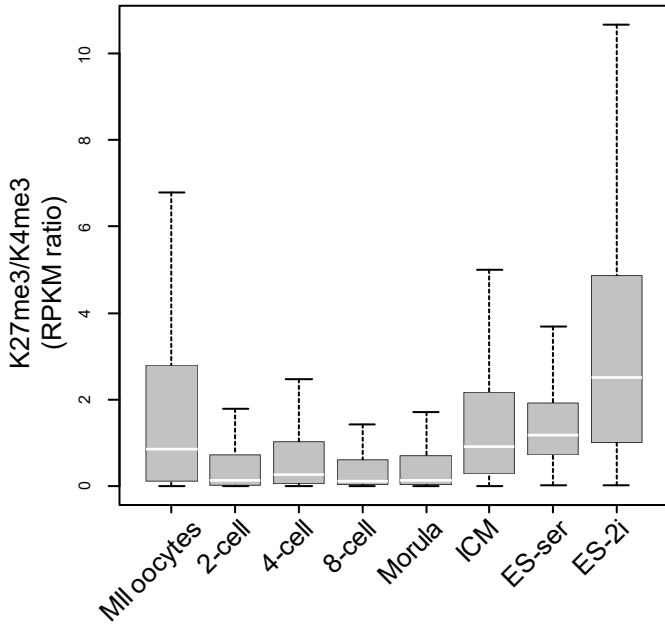

K4me3/K27me3 ratio development

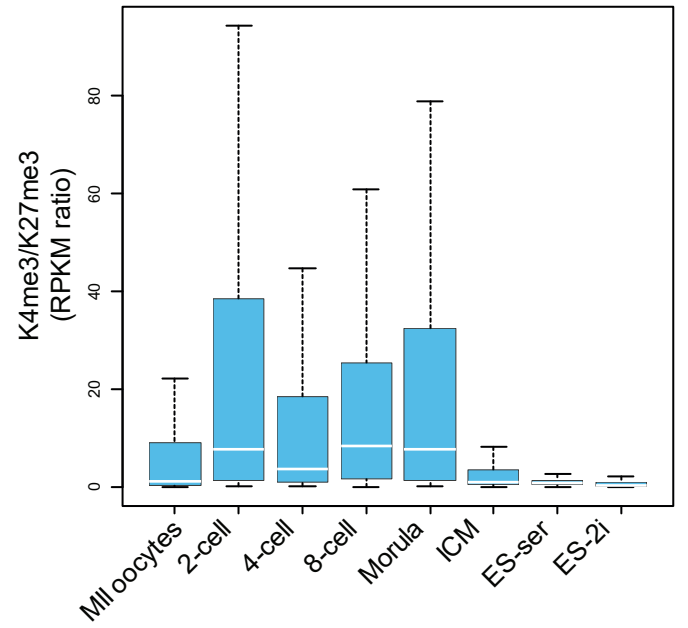

Supplement: 12915_2020_752_MOESM8_ESM.pdf [file 12915_2020_752_MOESM8_ESM.pdf]
