# Supplementary material for: Bivalent promoter hypermethylation in cancer is linked to the H327me3/H3K4me3 ratio in embryonic stem cells
Source: PubMed Central journal article supplement (PMC7057567; doi:10.1186/s12915-020-0752-3), 2020-03-04

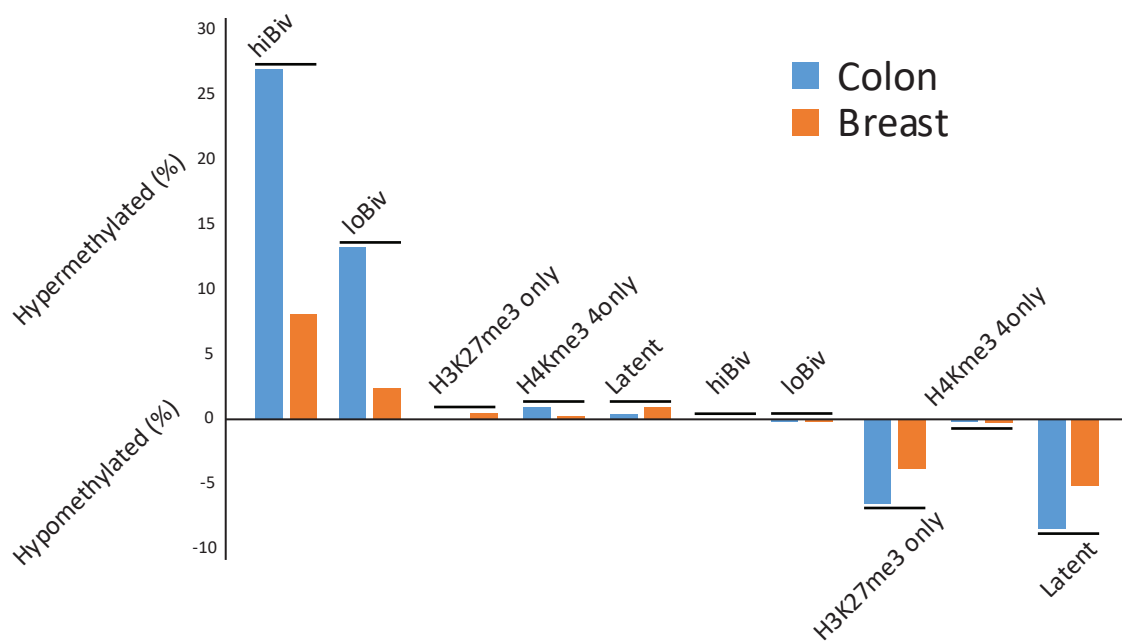

Supplement: 12915_2020_752_MOESM16_ESM.pdf [file 12915_2020_752_MOESM16_ESM.pdf]
